# Supplementary material
Source: MDPI journal article supplement (https://www.mdpi.com/2305-6320/11/1/3)
Supplement: s1 [file s1]

## SUPPLEMENTAL SECTION

### **Dimeric 3,5-bis(benzylidene)-4-piperidones : Tumor-selective cytotoxicity and structure-activity relationships**

*Swagatika Das*<sup>a</sup>, *Praveen K. Roayapalley*<sup>a,\*</sup>, *Hiroshi Sakagami*<sup>b</sup>, *Naoki Umemura*<sup>c</sup>, *Dennis K. J. Gorecki*<sup>a</sup>, *Mohammad Hossain*<sup>d</sup>, *Masami Kawase*<sup>e</sup>, *Umashankar Das*<sup>a</sup>, *Jonathan R. Dimmock*<sup>a</sup>

<sup>a</sup> Drug Discovery and Development Research Cluster, University of Saskatchewan, Saskatoon, Saskatchewan S7N 5E5, Canada

<sup>b</sup> Meikai University Research Institute of Odontology, Sakado, Saitama 350-0283, Japan

<sup>c</sup> Department of Oral Biochemistry, Asahi University School of Dentistry, Gifu 501-0296, Japan

<sup>d</sup> School of Sciences, Indiana University Kokomo, Kokomo, IN 46904-9003, USA

<sup>e</sup> Faculty of Pharmaceutical Sciences, Matsuyama University, Matsuyama, Ehime 790-8578, Japan

---

\*Corresponding author : E-mail : [rpraveen.sp@usask.ca](mailto:rpraveen.sp@usask.ca) Tel : +13067154217

**Table S1.** Search for correlations between various physicochemical parameters of the aryl substituents in **2a-g** and the CC<sub>50</sub> values.

| Bioassay | Plot | $\sigma$ | $\pi$ | MR |
|----------|------|----------|-------|----|
| HL-60    | l    | <0.05    | <0.01 | -- |
| HL-60    | sl   | --       | <0.01 | -- |
| HSC-2    | l    | <0.05    | <0.01 | -- |
| HSC-2    | sl   | --       | <0.05 | -- |
| HSC-3    | l    | <0.1     | <0.05 | -- |
| HSC-3    | sl   | --       | <0.05 | -- |
| HSC-4    | l    | <0.05    | <0.01 | -- |
| HSC-4    | sl   | --       | <0.05 | -- |

**Table S2.** Search for correlations between various physicochemical parameters of the aryl substituents in **3a-g** and the CC<sub>50</sub> values.

| Bioassay | Plot | $\sigma$ | $\pi$ | MR |
|----------|------|----------|-------|----|
| HL-60    | l    | <0.01    | <0.05 | -- |
| HL-60    | sl   | <0.1     | <0.01 | -- |
| HSC-2    | l    | <0.01    | <0.05 | -- |
| HSC-2    | sl   | <0.1     | <0.01 | -- |
| HSC-3    | l    | <0.01    | <0.01 | -- |
| HSC-3    | sl   | <0.1     | <0.01 | -- |
| HSC-4    | l    | <0.05    | <0.05 | -- |
| HSC-4    | sl   | <0.1     | >0.01 | -- |

Please note the following comments which pertain to Tables S1 and S2.

1. The letters l and sl refer to the plots being linear and semilogarithmic.
2. Only relationships ( $p < 0.05$ ) or tendencies to a relationship ( $p < 0.1$ ) are placed in the tables.
3. No correlations are designated as --.
4. All the correlations are positive.

**Table S3.** Search for correlations between various physicochemical parameters of the aryl substituents in **2a-g** and **3a-c,e-g** and the SI values.

| Compounds       | Plot | $\sigma$ | $\pi$ | MR |
|-----------------|------|----------|-------|----|
| <b>2a-g</b>     | l    | --       | --    | -- |
| <b>2a-g</b>     | sl   | <0.05    | <0.05 | -- |
| <b>3a-c,e-g</b> | l    | --       | --    | -- |
| <b>3a-c,e-g</b> | sl   | --       | --    | -- |

Please note the following comments which pertain to Table S3.

1. The letters l and sl refer to the plots being linear or semilogarithmic.
2. The correlations noted are negative.
3. No correlations are designated --.
